# Supplementary material for: Serum miRNAs Support the Indication for MRI-Ultrasound Fusion-Guided Biopsy of the Prostate in Patients with Low-PI-RADS Lesions
Source: MDPI journal article supplement (doi:10.3390/cells10061315), 2021-05-25
Supplement: s1 [file s1]

# Serum miRNAs support the indication for transrectal MRI-ultrasound fusion-guided biopsy of the prostate in patients with low-PI-RADS lesions

Bastian Keck, Angelika Borkowetz, Julia Poellmann, Thilo Jansen, Susanne Fuessel, Andreas Kahlmeyer, Manfred Wirth, Johannes Huber, Alexander Cavallaro, Matthias Hammon, Ivan Platzek, Arndt Hartmann, Gustavo Baretton, Frank Kunath, Danijel Sikic, Helge Taubert, Bernd Wullich, Kati Erdmann, Sven Wach

**Table S1.** Number of patients with corresponding Gleason scores and PI-RADS scores.

| (a): Discovery cohort           |           |           |           |           |           |
|---------------------------------|-----------|-----------|-----------|-----------|-----------|
| Parameter                       | PI-RADS 1 | PI-RADS 2 | PI-RADS 3 | PI-RADS 4 | PI-RADS 5 |
| Detected Tumor<br>Gleason Score |           |           |           |           |           |
| Negative Biopsy<br>(N=38)       | 0         | 0         | 6         | 25        | 7         |
| 6 (N=9)                         | 0         | 0         | 1         | 6         | 2         |
| 7a (N=16)                       | 1         | 0         | 0         | 10        | 5         |
| 7b (N=9)                        | 0         | 0         | 0         | 7         | 2         |
| 8 (N=2)                         | 0         | 0         | 1         | 0         | 1         |
| 9 (N=5)                         | 0         | 0         | 0         | 1         | 4         |
| 10 (N=1)                        | 0         | 0         | 0         | 0         | 1         |
|                                 |           |           |           |           |           |
| (b): Validation cohort          |           |           |           |           |           |
| Parameter                       | PI-RADS 1 | PI-RADS 2 | PI-RADS 3 | PI-RADS 4 | PI-RADS 5 |
| Detected Tumor<br>Gleason Score |           |           |           |           |           |
| Negative Biopsy<br>(N=103)      | 0         | 16        | 38        | 43        | 6         |
| 6 (N=17)                        | 0         | 3         | 5         | 7         | 2         |
| 7a (N=49)                       | 0         | 1         | 9         | 25        | 14        |
| 7b (N=9)                        | 0         | 1         | 1         | 2         | 5         |
| 8 (N=11)                        | 0         | 3         | 1         | 5         | 2         |
| 9 (N=20)                        | 0         | 0         | 3         | 2         | 15        |
| 10 (N=0)                        | 0         | 0         | 0         | 0         | 0         |

**Table S2.** Comparison of pathological and predicted outcome; Covariates and regression coefficients of the optimized regression model for predicting Tumour status.

|                                    |                          | <b>Predicted disease status</b> |           |                   |
|------------------------------------|--------------------------|---------------------------------|-----------|-------------------|
|                                    |                          | Tumor-free                      | Tumor     |                   |
| <b>Pathological disease status</b> | Tumor-free               | 94                              | 44        | Specificity 68.1% |
|                                    | Tumor                    | 43                              | 107       | Sensitivity 71.3% |
|                                    |                          | NPV 68.6%                       | PPV 70.9% |                   |
|                                    |                          |                                 |           |                   |
| <b>Covariate</b>                   | <b>Model coefficient</b> |                                 |           |                   |
| Intercept                          | 10.01852936              |                                 |           |                   |
| Patient age                        | -0.07036056              |                                 |           |                   |
| Pre-biopsy PSA level               | -0.03517680              |                                 |           |                   |
| Previous biopsy procedure          | -0.22310466              |                                 |           |                   |
| Highest PIRADS score               | -0.63490785              |                                 |           |                   |
| miR-375-3p                         | -0.03835900              |                                 |           |                   |
| let-7c-5p                          | -0.14499602              |                                 |           |                   |
| miR-210-3p                         | 0.02283841               |                                 |           |                   |
| miR-486-5p                         | -0.12069582              |                                 |           |                   |

**Table S3.** Net. expected regret differences at defined threshold cut-off values. Pair-wise comparisons of regret differences for the detection of significant PCa in patients with lesions of PI-RADS  $\leq 3$ .

| Threshold | Biopsy none | Advantage Biopsy all over none | Advantage model over biopsy none | Advantage model over biopsy all |
|-----------|-------------|--------------------------------|----------------------------------|---------------------------------|
| 0.01      | 0           | 0.228237430                    | 0.22823743                       | NA                              |
| 0.02      | 0           | 0.220362302                    | 0.22105022                       | 0.0006879156                    |
| 0.03      | 0           | 0.212324800                    | 0.21371482                       | 0.0013900151                    |
| 0.04      | 0           | 0.204119850                    | 0.20739700                       | 0.0032771536                    |
| 0.05      | 0           | 0.195742164                    | 0.19041987                       | -0.0053222945                   |
| 0.06      | 0           | 0.187186230                    | 0.18312216                       | -0.0040640689                   |
| 0.07      | 0           | 0.178446297                    | 0.17905038                       | 0.0006040836                    |
| 0.08      | 0           | 0.169516365                    | 0.17293600                       | 0.0034196385                    |
| 0.09      | 0           | 0.160390172                    | 0.16804544                       | 0.0076552661                    |
| 0.10      | 0           | 0.151061174                    | 0.16604245                       | 0.0149812734                    |
| 0.11      | 0           | 0.141522535                    | 0.16083828                       | 0.0193157430                    |
| 0.12      | 0           | 0.131767109                    | 0.15883555                       | 0.0270684372                    |
| 0.13      | 0           | 0.121787421                    | 0.15924060                       | 0.0374531835                    |
| 0.14      | 0           | 0.111575647                    | 0.16070029                       | 0.0491246407                    |
| 0.15      | 0           | 0.101123596                    | 0.14606742                       | 0.0449438202                    |
| 0.16      | 0           | 0.090422686                    | 0.13376137                       | 0.0433386838                    |
| 0.17      | 0           | 0.079463923                    | 0.12197103                       | 0.0425071071                    |
| 0.18      | 0           | 0.068237873                    | 0.12441765                       | 0.0561797753                    |
| 0.19      | 0           | 0.056734637                    | 0.10861423                       | 0.0518795950                    |
| 0.20      | 0           | 0.044943820                    | 0.10393258                       | 0.0589887640                    |
| 0.21      | 0           | 0.032854501                    | 0.10809273                       | 0.0752382307                    |
| 0.22      | 0           | 0.020455200                    | 0.10688562                       | 0.0864304235                    |
| 0.23      | 0           | 0.007733839                    | 0.09805924                       | 0.0903254049                    |
| 0.24      | 0           | -0.005322295                   | 0.08633944                       | 0.0916617386                    |
| 0.25      | 0           | -0.018726592                   | 0.08988764                       | 0.1086142322                    |
| 0.26      | 0           | -0.032493167                   | 0.08624355                       | 0.1187367142                    |
| 0.27      | 0           | -0.046636909                   | 0.07126366                       | 0.1179005695                    |
| 0.28      | 0           | -0.061173533                   | 0.05617978                       | 0.1173533084                    |
| 0.29      | 0           | -0.076119639                   | 0.05681279                       | 0.1329324260                    |
| 0.30      | 0           | -0.091492777                   | 0.05778491                       | 0.1492776886                    |
| 0.31      | 0           | -0.107311513                   | 0.05406286                       | 0.1613743690                    |
| 0.32      | 0           | -0.123595506                   | 0.06080635                       | 0.1844018506                    |
| 0.33      | 0           | -0.140365588                   | 0.05718598                       | 0.1975515680                    |
| 0.34      | 0           | -0.157643854                   | 0.05447736                       | 0.2121212121                    |
| 0.35      | 0           | -0.175453760                   | 0.04062230                       | 0.2160760588                    |
| 0.36      | 0           | -0.193820225                   | 0.05688202                       | 0.2507022472                    |
| 0.37      | 0           | -0.212769752                   | 0.04369538                       | 0.2564651329                    |
| 0.38      | 0           | -0.232330555                   | 0.04168177                       | 0.2740123233                    |
| 0.39      | 0           | -0.252532695                   | 0.03960214                       | 0.2921348315                    |
| 0.40      | 0           | -0.273408240                   | 0.04494382                       | 0.3183520599                    |
| 0.41      | 0           | -0.294991430                   | 0.04741954                       | 0.3424109693                    |
| 0.42      | 0           | -0.317318869                   | 0.04610616                       | 0.3634250291                    |

|      |   |              |            |              |
|------|---|--------------|------------|--------------|
| 0.43 | 0 | -0.340429726 | 0.05322295 | 0.3936526710 |
| 0.44 | 0 | -0.364365971 | 0.06099518 | 0.4253611557 |
| 0.45 | 0 | -0.389172625 | 0.06026558 | 0.4494382022 |
| 0.46 | 0 | -0.414898044 | 0.04827299 | 0.4631710362 |
| 0.47 | 0 | -0.441594234 | 0.03625185 | 0.4778460886 |
| 0.48 | 0 | -0.469317200 | 0.03543647 | 0.5047536733 |
| 0.49 | 0 | -0.498127341 | 0.03458912 | 0.5327164574 |
| 0.50 | 0 | -0.528089888 | 0.03370787 | 0.5617977528 |
| 0.51 | 0 | -0.559275396 | 0.03279064 | 0.5920660399 |
| 0.52 | 0 | -0.591760300 | 0.03183521 | 0.6235955056 |
| 0.53 | 0 | -0.625627540 | 0.03083911 | 0.6564666507 |
| 0.54 | 0 | -0.660967269 | 0.01856375 | 0.6795310210 |
| 0.55 | 0 | -0.697877653 | 0.01747815 | 0.7153558052 |
| 0.56 | 0 | -0.736465781 | 0.01634321 | 0.7528089888 |
| 0.57 | 0 | -0.776848707 | 0.01515547 | 0.7920041808 |
| 0.58 | 0 | -0.819154628 | 0.01391118 | 0.8330658106 |
| 0.59 | 0 | -0.863524253 | 0.02877501 | 0.8922992601 |
| 0.60 | 0 | -0.910112360 | 0.02808989 | 0.9382022472 |
| 0.61 | 0 | -0.959089600 | 0.01613368 | 0.9752232786 |
| 0.62 | 0 | -1.010644589 | 0.01537552 | 1.0260201064 |
| 0.63 | 0 | -1.064986335 | 0.01457637 | 1.0795627088 |
| 0.64 | 0 | -1.122347066 | 0.01373283 | 1.1360799001 |
| 0.65 | 0 | -1.182985554 | 0.01284109 | 1.1958266453 |
| 0.66 | 0 | -1.247191011 | 0.02247191 | 1.2696629213 |
| 0.67 | 0 | -1.315287709 | 0.02247191 | 1.3377596187 |
| 0.68 | 0 | -1.387640449 | 0.02247191 | 1.4101123596 |
| 0.69 | 0 | -1.464661109 | 0.02247191 | 1.4871330192 |
| 0.70 | 0 | -1.546816479 | 0.02247191 | 1.5692883895 |
| 0.71 | 0 | -1.634637737 | 0.02247191 | 1.6571096474 |
| 0.72 | 0 | -1.728731942 | 0.02247191 | 1.7512038523 |
| 0.73 | 0 | -1.829796088 | 0.02247191 | 1.8522679983 |
| 0.74 | 0 | -1.938634399 | 0.02247191 | 1.9611063094 |
| 0.75 | 0 | -2.056179775 | 0.02247191 | 2.0786516854 |
| 0.76 | 0 | -2.183520599 | 0.02247191 | 2.2059925094 |
| 0.77 | 0 | -2.321934538 | 0.02247191 | 2.3444064485 |
| 0.78 | 0 | -2.472931563 | 0.02247191 | 2.4954034729 |
| 0.79 | 0 | -2.638309256 | 0.02247191 | 2.6607811664 |
| 0.80 | 0 | -2.820224719 | 0.02247191 | 2.8426966292 |
| 0.81 | 0 | -3.021289178 | 0.02247191 | 3.0437610881 |
| 0.82 | 0 | -3.244694132 | 0.02247191 | 3.2671660424 |
| 0.83 | 0 | -3.494382022 | 0.02247191 | 3.5168539326 |
| 0.84 | 0 | -3.775280899 | 0.02247191 | 3.7977528090 |
| 0.85 | 0 | -4.093632959 | 0.02247191 | 4.1161048689 |
| 0.86 | 0 | -4.457463884 | 0.02247191 | 4.4799357945 |
| 0.87 | 0 | -4.877268799 | 0.02247191 | 4.8997407087 |
| 0.88 | 0 | -5.367041199 | 0.02247191 | 5.3895131086 |

|      |   |               |            |               |
|------|---|---------------|------------|---------------|
| 0.89 | 0 | -5.945863126  | 0.02247191 | 5.9683350358  |
| 0.90 | 0 | -6.640449438  | 0.02247191 | 6.6629213483  |
| 0.91 | 0 | -7.489388265  | 0.02247191 | 7.5118601748  |
| 0.92 | 0 | -8.550561798  | 0.02247191 | 8.5730337079  |
| 0.93 | 0 | -9.914927769  | 0.02247191 | 9.9373996790  |
| 0.94 | 0 | -11.734082397 | 0.02247191 | 11.7565543071 |
| 0.95 | 0 | -14.280898876 | 0.02247191 | 14.3033707865 |
| 0.96 | 0 | -18.101123596 | 0.02247191 | 18.1235955056 |
| 0.97 | 0 | -24.468164794 | 0.01123596 | 24.4794007491 |
| 0.98 | 0 | -37.202247191 | 0.00000000 | 0.0000000000  |
| 0.99 | 0 | -75.404494382 | 0.00000000 | 0.0000000000  |

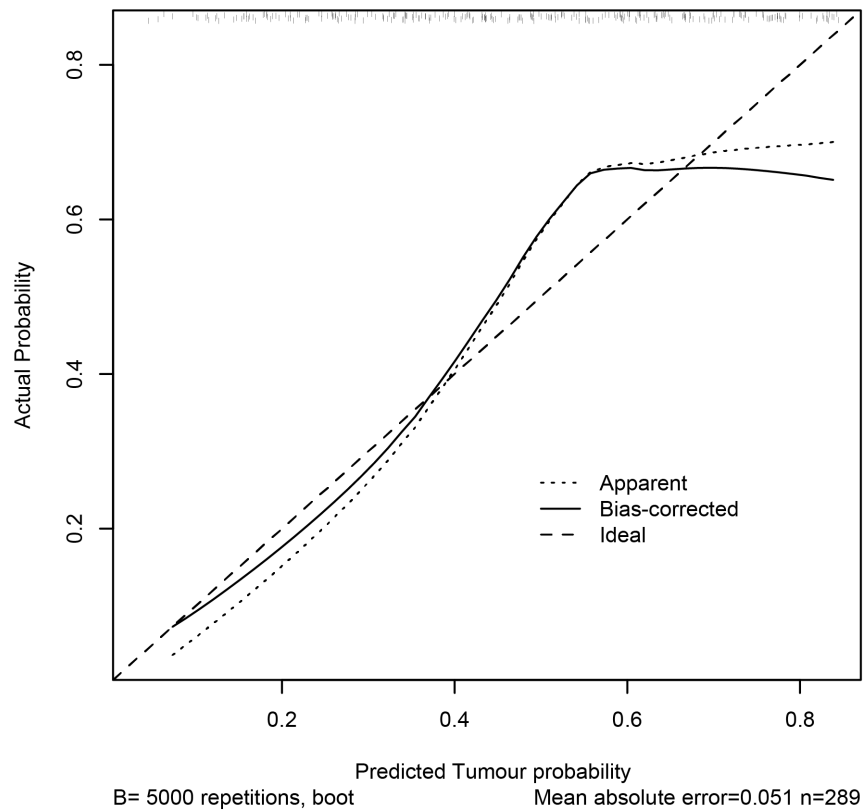

Supplementary Fig 1. Calibration plot of the optimized regression model for predicting Tumour status. Predicted and actual tumor probability, based on 5000 bootstrap replicates.

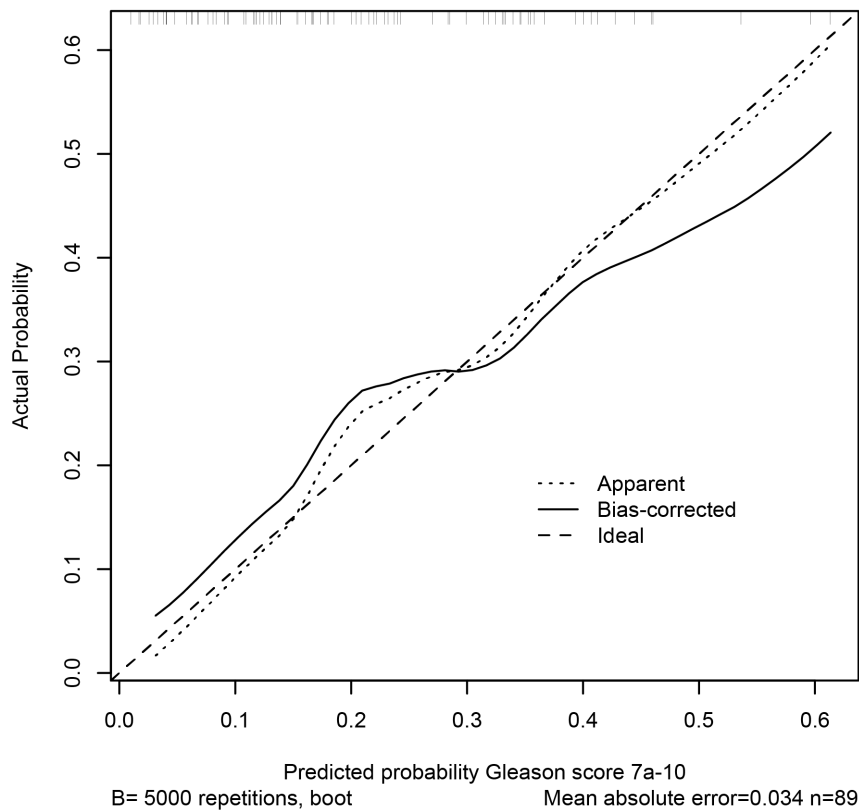

Supplementary Fig 2. Calibration plot of the optimized regression model for predicting significant PCa in patients with PI-RADS scores 1, 2, and 3. Predicted and actual probability of significant PCa, based on 5000 bootstrap replicates.

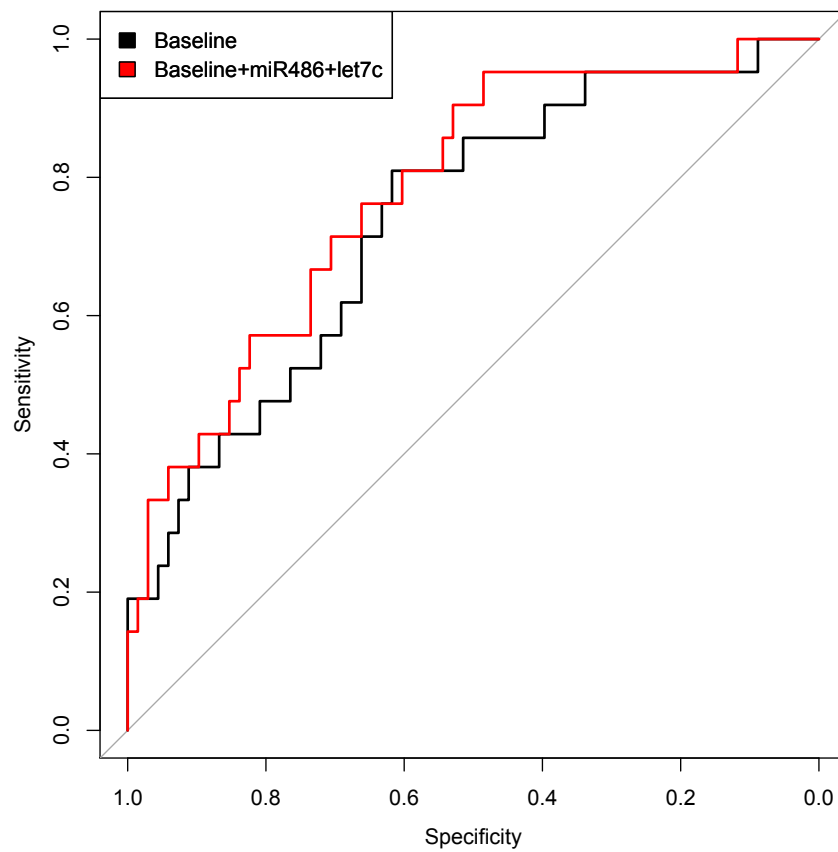

Supplementary Fig3. Receiver-operator curve comparison of the baseline model and the baseline model with miRNAs miR-486-5p and let-7c-5p for the prediction of csPCa.
